# Supplementary material
Source: PubMed Central journal article supplement (PMC4423360)
Supplement: 10.1534_115.175604_genetics.115.175604-2.pdf [file 10.1534_115.175604_genetics.115.175604-2.pdf]

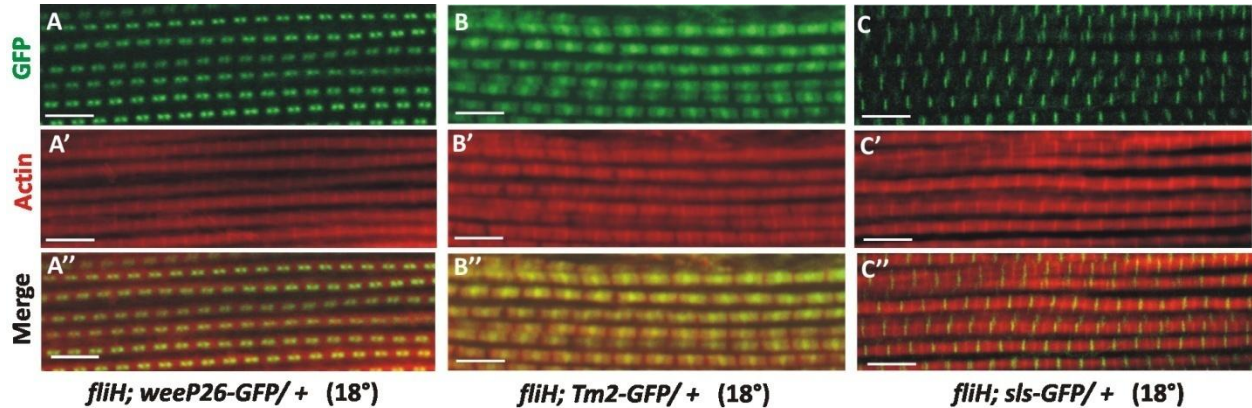

**Figure S2.** Assembly of the myofilaments in adult *fliH* flies raised at 18°. (A-C'') Confocal images which are comparable to the wild type (compare with representative pictures from wild type background in Figure S1). (Scale bar, 5 $\mu$ m).
